# Supplementary material for: Integrated machine learning survival framework develops a prognostic model based on inter-crosstalk definition of mitochondrial function and cell death patterns in a large multicenter cohort for lower-grade glioma
Source: J Transl Med. 2023 Sep 2;21:588. doi: 10.1186/s12967-023-04468-x (PMC10474752; doi:10.1186/s12967-023-04468-x)
Supplement: Supplementary file 9 — Additional file 9: The information of 1548 genes related to PCD. [file 12967_2023_4468_MOESM9_ESM.xlsx]

## Sheet: Sheet1
Supplementary Table 1. The information of 1548 genes related to PCD
No.	Apoptosis	Pyroptosis	Ferroptosis	Autophagy	Necroptosis	Cuproptosis	Parthanatos	Entoticcelldeath	Netoticcelldeath	Lysosome-dependentcelldeath	Alkaliptosis	Oxeiptosis	NETosis	Immunogenic cell death	Anoikis	Paraptosis	Methuosis	Entosis	all=1964
1	AATF	BAK1	ABCC1	ABL1	GLUD1	NFE2L2	PARP	AMPK	ELANE	ABCA2	IKBKB	PGAM5	MYD88	ATG5	BRMS1	CAMK2B	CSNK2A1	AR
2	ABL1	BAX	ACACA	ABL2	GLUD2	NLRP3	MIF	ATG5	MMP1	ABCB9	NFKB1	KEAP1	TLR2	BAX	PTK2	PRKACG	RAC1	TP53
3	ACAA2	CASP1	ACO1	ACER2	ALOX15	ATP7B	AIFM1	ATG7	MPO	ACP2	CA9	AIFM1	PAD4	CALR	NTRK2	MARK4	ARF6	ROCK1
4	ACKR3	CASP3	ACSF2	ADRA1A	FTH1	ATP7A	HSP70	BECN1	CAMP	ACP5	CHUK	NRF2	PRKCA	CASP1	BCL2L11	SSTR5	GIT1	PCK2
5	ACVR1	CASP4	ACSL1	ADRB2	PYG	SLC31A1	PAAN	CDC42	PADI4	ADGRE2	IKBKG	AIRE	PKCB	CASP8	SRC	TAAR5	MTOR	TNFSF10
6	ACVR1B	CASP5	ACSL3	AKT1	CAPN1	FDX1	ARH3	CDH1	EIPA	AGA	NFKB1A		PRKCZ	CD4	CEACAM6	USP10	MET	MTUS2
7	ADORA1	CASP6	ACSL4	AMBRA1	CASP1	LIAS	RNF146	CTNNA1	NCX1	AP1B1	RELA		NOX3	CD8A	CAV1	PRKAG3	PFKFB3	AURKA
8	AEN	CASP8	ACSL5	ATF6	GLNA	LIPT1	ADPRHL2	CYBB	MIA	AP1G1			NOX4	CD8B	AKT1	HACD2	MIR199A1	KIF2C
9	AGT	CASP9	ACSL6	ATG101	BAX	LIPT2	OGG1	MYH14		AP1M1			NOX1	CXCR3	ITGB1	NT5C		RHOA
10	AGTR2	CHMP2A	AIFM2	ATG13	BCL2	DLD		PI3KC3		AP1M2			CTSG	EIF2AK3	CEACAM5	INSRR		MTOR
11	AIFM1	CHMP2B	AKR1C1	ATG14	FADD	DLAT		RHOA		AP1S1			PRTN3	ENTPD1	EGFR	SSTR3		EZR
12	AKT1	CHMP3	AKR1C2	ATG2A	RIPK1	PDHA1		RNF146		AP1S2			ELANE	FOXP3	BCL2	TAAR9		GZMB
13	ANXA6	CHMP4A	AKR1C3	ATG2B	TNF	PDHB		ROCK		AP1S3			MPO	HMGB1	CASP8	HSPB8		MRTFA
14	APAF1	CHMP4B	ALOX12	ATG5	TNFRSF1A	MTF1		RUBCN		AP3B1			GSDMD	HSP90AA1	SIK1	PLPP2		PTK2
15	APPL1	CHMP4C	ALOX15	ATG7	TRADD	GLS		UVRAG		AP3B2			IL1B	IFNA1	PTRH2	G6PC2		DIAPH1
16	AR	CHMP6	ALOX5	ATM	TRAF2	CDKN2A				AP3D1			CXCL1	IFNB1	STAT3	GUCY2EP		LPAR2
17	ARHGEF2	CHMP7	ATG5	ATP13A2	PPIA	DBT				AP3M1			PLA2G7	IFNG	TLE1	CDK4		MAP1LC3A
18	ARL6IP5	CYCS	ATG7	ATP6V0A1	CAPN2	GCSH				AP3M2			CXCL8	IFNGR1	DAPK2	RGR		PIKFYVE
19	ARMC10	ELANE	ATP5MC3	ATP6V0A2	HSP90A	DLST				AP3S1			CDK6	IL10	CTNNB1	ADGRG1		CTTN
20	ARRB2	GPX4	BACH1	ATP6V0B	IL1A					AP3S2			HMGB1	IL17A	ZNF304	UQCRC1		MCOLN1
21	ASAH2	GSDMB	CARS	ATP6V0C	TNFSF6					AP4B1			MMP9	IL17RA	MAPK1	TNK2		FOXO1
22	ATF3	GSDMC	CBS	ATP6V0D1	TNFRSF6					AP4E1			AGER	IL1B	BMF	RNF181		CTNNA1
23	ATF4	GSDMD	CD44	ATP6V0D2	CASP8					AP4M1			CSF3	IL1R1	ITGA5	MKNK2		CXCL8
24	ATM	GSDME	CHAC1	ATP6V0E1	JNK					AP4S1			TGFB1	IL6	TP53	UBE2U
25	ATP2A1	GZMB	CISD1	ATP6V0E2	JAK2					ARF1				LY96	MCL1	MYLK
26	ATP2A3	HMGB1	CP	ATP6V1A	CAMK2					ARL8B				MYD88	BCL2L1	CTDSP2
27	ATP5IF1	IL18	CRYAB	ATP6V1B1	IL1B					ARSA				NLRP3	CASP3	LCK
28	AVP	IL1A	CS	ATP6V1B2	IFNG					ARSB				NT5E	CDH1	GPR15
29	BAD	IL1B	CYBB	ATP6V1C1	STAT3					ARSG				P2RX7	BAD	ATP23
30	BAG3	IRF1	DPP4	ATP6V1C2	IRF9					ASAH1				PDIA3	PIK3CA	LPAR1
31	BAG5	IRF2	EMC2	ATP6V1D	TNFSF10					ATP10B				PIK3CA	PAK1	PI4KB
32	BAG6	NLRC4	FADS2	ATP6V1E1	TNFRSF10A					ATP13A2				PRF1	ITGAV	DSTYK
33	BAK1	NLRP1	FANCD2	ATP6V1E2	TNFRSF10B					ATP6AP1				TLR4	FN1	CFD
34	BAX	NLRP2	FDFT1	ATP6V1G1	CFLAR					ATP6V0A1				TNF	MAPK3	PPP3CA
35	BBC3	NLRP3	FTH1	ATP6V1G2	XIAP					ATP6V0A2					PTGS2	CCR4
36	BCAP31	NLRP6	FTL	ATP6V1H	BID					ATP6V0A4					BAX	PRAG1
37	BCL10	NLRP7	FTMT	AUP1	AIFM1					ATP6V0B					BCAR1	CDKN3
38	BCL2	NOD1	G6PD	BAD	TRPM7					ATP6V0C					PTEN	GPR153
39	BCL2A1	PLCG1	GCLC	BAG3	IFNAR1					ATP6V0D1					ERBB2	DDIT3
40	BCL2L1	PJVK	GCLM	BCL2	IFNAR2					ATP6V0D2					ANGPTL4	MAPK8
41	BCL2L10	PRKACA	GLS2	BCL2L11	IFNGR1					ATP6V1H					PDK4	MAP2K2
42	BCL2L11	PYCARD	GOT1	BECN1	IFNGR2					BLK					CYCS	MAPK1
43	BCL2L12	SCAF11	GPX4	BMF	TLR3					BLOC1S1					BRAF	MAPK14
44	BCL2L14	TINAP	GSS	BNIP3	TIRP					BLOC1S2					YAP1	IGF1R
45	BCL2L2	TNF	HMGCR	BNIP3L	IFNA					BORCS5					ANKRD13C	PDCD6IP
46	BCL3	TP53	HMOX1	BOK	IFNB					BORCS6					ITGA2	CASP9
47	BCLAF1	TP63	HSBP1	C9orf72	TRIF					BTK					ANXA5	ERN1
48	BDKRB2	AIM2	HSPB1	CALCOCO2	VDAC1					C12orf4					BIRC5	ATF6
49	BDNF	GSDMA	IREB2	CAMKK2	SLC25A4S					CBL					MTOR	XBP1
50	BECN1	IL6	KEAP1	CAPN1	PPID					CD164					TIMP1	AKT1
51	BID	NOD2	LPCAT3	CAPNS1	CYLD					CD300A					BDNF	EIF2S1
52	BIK	TIRAP	MAP1LC3A	CASP1	RIPK3					CD63					CSPG4	HSPA5
53	BIRC6		MAP1LC3B	CASP3	MLKL					CD68					BSG	CASP4
54	BLOC1S2		MAP1LC3C	CDC37	TRAF5					CD84					AKT2	CASP3
55	BMF		MT1G	CDK5	TLR4					CHGA					STK11	CASP7
56	BMP4		NCOA4	CDK5R1	RBCK1					CLN3					IGF1	ITPR3
57	BMP5		NFE2L2	CHMP4A	HMGB1					CLN5					IGF1R	RYR1
58	BMPR1B		NFS1	CHMP4B	JAK1					CLNK					ITGA6	RYR2
59	BNIP3		NOX1	CISD2	JAK3					CLTA					ILK	MCU
60	BNIP3L		NQO1	CLEC16A	TYK2					CLTB					CFLAR	TNFRSF19
61	BOK		NRF2	CLN3	STAT1					CLTC					RHOA	PDCD5
62	BRCA1		OTUB1	CLU	STAT2					CLTCL1					HIF1A	CSF1
63	BRCA2		PCBP1	CPTP	STAT4					CLU					DAP3	TP53
64	BRSK2		PCBP2	CSNK2A2	STAT5A					CPLX2					MYBBP1A	NFKB1
65	BTK		PEBP1	CTSA	STAT5B					CTNS					TLE5	PEBP1
66	CAAP1		PGD	CTTN	STAT6					CTSA					ITGA3	PHB
67	CASP1		PHKG2	DAP	H2A					CTSB					PTK2B
68	CASP10		PRNP	DAPK1	TNFAIP3					CTSC					CCND1
69	CASP12		PROM2	DAPK2	RNF31					CTSD					CTTN
70	CASP2		PTGS2	DAPK3	CHMP2A					CTSE					CALR
71	CASP3		RPL8	DAPL1	CHMP2B					CTSF					ATF4
72	CASP4		SAT1	DCN	VPS24					CTSG					CDCP1
73	CASP5		SAT2	DDIT3	CHMP4A					CTSH					PLAUR
74	CASP8		SLC11A2	DDRGK1	CHMP4B					CTSK					SKP2
75	CASP8AP2		SLC1A5	DEPDC5	CHMP6					CTSL					CHEK2
76	CASP9		SLC39A14	DEPP1	VPS4					CTSO					HGF
77	CAV1		SLC39A8	DHRSX	CHMP1					CTSS					E2F1
78	CCAR2		SLC3A2	DNM1L	CHMP5					CTSV					EGF
79	CCK		SLC40A1	DRAM1	SMPD1					CTSW					PIK3CG
80	CD14		SLC7A11	DRAM2	PYCARD					CTSZ					ITGB4
81	CD24		SQLE	EEF1A1	NLRP3					DEF8					DAPK1
82	CD27		STEAP3	EEF1A2	ZBP1					DNASE2					MAPK8
83	CD28		TF	EIF2AK4	IL33					DNASE2B					PIK3R1
84	CD38		TFRC	EIF4G1	FTL					ENTPD4					PIK3R3
85	CD3E		TP53	EIF4G2	SQSTM1					FAM98A					MAP2K1
86	CD44		VDAC2	ELAPOR1	VDAC2					FER					CXCL12
87	CD5		VDAC3	EP300	VDAC3					FES					LGALS3
88	CD70		ZEB1	EPM2A	CHMP7					FGR					FBXW7-AS1
89	CD74			ERCC4	PGAM5					FLCN					BAK1
90	CDIP1			ERN1	BIRC2					FOXF1					ABHD4
91	CDKN1A			EXOC1	BIRC3					FTH1					CD44
92	CDKN2D			EXOC4	EIF2AK2					FTL					ITGA4
93	CEBPB			EXOC7	PLA2G4					FUCA1					FADD
94	CFLAR			EXOC8	DNM1L					GAA					PHLDA2
95	CHAC1			FBXL2	SPATA2					GAB2					TGFB1
96	CHCHD10			FBXO7	FAF1					GALC					HMCN1
97	CHEK2			FBXW7	SHARPIN					GALNS					MMP2
98	CIB1			FEZ1	NOX2					GATA2					CEBPB
99	CIDEB			FEZ2	USP21					GBA					CEMIP
100	CLU			FLCN	PARP1					GCC2					CDKN3
101	COA8			FOXK1	CHMP4C					GGA1					CBL
102	COL2A1			FOXK2						GGA2					CASP9
103	CRADD			FOXO1						GGA3					SFN
104	CREB3			FOXO3						GLA					MTDH
105	CREB3L1			FTH1						GLB1					PRKCA
106	CRH			FTL						GM2A					TNFRSF10B
107	CRIP1			FYCO1						GNPTAB					CXCL8
108	CSF2			FZD5						GNPTG					MIR200C
109	CSNK2A1			GAPDH						GNS					AR
110	CSNK2A2			GATA4						GUSB					CDKN2A
111	CTH			GBA						HDAC6					CPT1A
112	CTNNA1			GFAP						HEXA					PIK3CB
113	CTSC			GNAI3						HEXB					CLDN1
114	CTTN			GOLGA2						HGS					MIR204
115	CUL1			GPR137						HGSNAT					MIR26A1
116	CUL2			GPR137B						HMOX1					CDKN1A
117	CUL3			GPSM1						HPS6					CDKN1B
118	CUL4A			GSK3A						HSPA8					KLF12
119	CUL5			GSK3B						HYAL1					NTRK1
120	CX3CL1			HAX1						IDS					PLAU
121	CX3CR1			HDAC6						IDUA					MYC
122	CXCL12			HERC1						IGF2R					SMAD4
123	CYLD			HGF						IL13					PLK1
124	CYP1B1			HIF1A						IL13RA2					MUC1
125	DAB2IP			HMGB1						IL4					LGALS1
126	DAP			HMOX1						IL4R					PYCARD
127	DAP3			HSP90AA1						KIF1B					SESN2
128	DAPK1			HSPA8						KIT					ITGB3
129	DAPK2			HSPB1						KXD1					KRAS
130	DAPK3			HSPB8						LAMP1					THBS1
131	DAPL1			HTR2B						LAMP2					BID
132	DAXX			HTRA2						LAMP3					HRAS
133	DBH			HTT						LAMTOR1					CDK11B
134	DCC			HUWE1						LAPTM4A					CDK11A
135	DDIAS			IFI16						LAPTM4B					XIAP
136	DDIT3			IFNG						LAPTM5					PPARG
137	DDIT4			IKBKG						LAT					IL6
138	DDX3X			IL10						LAT2					MIR145
139	DDX47			IL10RA						LGALS9					CCR7
140	DDX5			IL4						LGMN					MSLN
141	DEDD			IRGM						LIPA					RAC1
142	DEDD2			ITPR1						LRRK2					GRHL2
143	DELE1			KAT5						LYN					BIRC3
144	DEPTOR			KAT8						M6PR					NOTCH1
145	DIABLO			KDM4A						MAN2B1					RHOG
146	DIDO1			KDR						MANBA					CCAR2
147	DNAJA1			KEAP1						MAP1LC3A					NQO1
148	DNAJC10			KIF25						MAP6					MMP13
149	DNM1L			KLHL22						MCOLN1					FAS
150	DPF2			KLHL3						MFSD8					MTA1
151	DYRK2			LACRT						MILR1					MYO5A
152	E2F1			LAMP1						MRGPRX2					EDA2R
153	E2F2			LAMP2						MT3					CCN6
154	EDA2R			LAMP3						MYH9					MMP9
155	EIF2AK3			LAMTOR1						NAGA					ABL1
156	ELL3			LAMTOR2						NAGLU					MAPK11
157	ENO1			LAMTOR3						NAGPA					SOD2
158	EP300			LAMTOR4						NAPSA					PTHLH
159	EPHA2			LAMTOR5						NCOA4					PDGFB
160	EPO			LARP1						NDEL1					GLI2
161	ERBB3			LEP						NEDD4					EZH2
162	ERCC6			LEPR						NEU1					RIPK1
163	ERN1			LGALS8						NPC1					CXCR4
164	ERN2			LRRK2						NPC2					HMGA1
165	ERO1A			LRSAM1						NR4A3					SIK2
166	ERP29			LZTS1						PDPK1					TNFSF10
167	EYA1			MAP1LC3A						PIK3C3					ANGPTL2
168	EYA2			MAP1LC3B						PIK3CD					S100A4
169	EYA3			MAP1LC3C						PIK3CG					NTF3
170	EYA4			MAP3K7						PIP4K2A					ETV4
171	FADD			MAPK15						PIP4K2B					MIR21
172	FAF1			MAPK3						PIP4P1					MIR124-1
173	FAIM			MAPK8						PLA2G15					HTRA1
174	FAIM2			MAPT						PLA2G3					LATS1
175	FAM162A			MCL1						PLEKHM1					CEACAM3
176	FAS			MEFV						PLEKHM2					EIF2AK3
177	FASLG			MET						PPT1					LAMC2
178	FASTK			MFN2						PPT2					LAMA3
179	FBH1			MFSD8						PSAP					LAMB3
180	FBXW7			MID2						PSAPL1					CDH2
181	FEM1B			MIR199A1						PTGDR					CSNK2A1
182	FGA			MIRLET7B						PTGDS					EDIL3
183	FGB			MLST8						RAB34					ZEB2
184	FGF10			MT3						RAB3A					TLN1
185	FGFR1			MTCL1						RAB7A					EPHA2
186	FGFR3			MTDH						RAC2					SIRT3
187	FGG			MTM1						RUBCNL					OLFM3
188	FHIT			MTMR3						S100A13					CLU
189	FIGNL1			MTMR4						SCARB2					SPINK1
190	FIS1			MTMR8						SGSH					CPEB2
191	FNIP2			MTMR9						SLC11A1					NAT1
192	FXN			MTOR						SLC11A2					TSG101
193	FYN			NCOA4						SLC17A5					MIR200A
194	FZD9			NEDD4						SMPD1					MIR6744
195	G0S2			NLRP6						SNAP23					SERPINA1
196	GABARAP			NOD1						SNAPIN					AKT3
197	GATA1			NOD2						SNX16					RELA
198	GATA4			NPC1						SNX4					TNFRSF1A
199	GCLM			NPRL2						SORL1					FASLG
200	GDNF			NRBP2						SORT1					AFP
201	GFRAL			NUPR1						SPAG9					ITGA8
202	GGCT			OPTN						SPHK2					NOX4
203	GHITM			ORMDL3						SQSTM1					PBK
204	GNAI2			OSBPL7						STXBP1					SATB1
205	GNAI3			PAFAH1B2						STXBP2					CD63
206	GPER1			PARK7						SUMF1					EEF1A1
207	GPX1			PHB2						SYK					LTB4R2
208	GRINA			PHF23						SYTL4					MAVS
209	GSDME			PIK3C2A						TCIRG1					HRC
210	GSK3A			PIK3C3						TFEB					CCN2
211	GSK3B			PIK3CA						TMEM106B					RHOB
212	GSKIP			PIK3CB						TPP1					PPP1R13B
213	GSTP1			PIK3R2						UNC13D					PLG
214	GZMB			PIM2						VAMP7					MET
215	HDAC1			PINK1						VAMP8					RAF1
216	HERPUD1			PIP4K2A						VPS33A					PARP1
217	HGF			PIP4K2B						VPS33B					PRKCQ
218	HIC1			PIP4K2C						VPS4A					BRCA2
219	HIF1A			PJVK						WASH3P					RB1
220	HINT1			PLEKHF1						ZFYVE16					SP1
221	HIP1			PLK2											HAVCR2
222	HIP1R			PLK3											DOCK1
223	HIPK1			POLDIP2											VTN
224	HIPK2			PRKAA1											INHBB
225	HMGB2			PRKAA2											PDCD4
226	HMOX1			PRKAB1											PRPF4B
227	HNRNPK			PRKAB2											RANBP9
228	HRAS			PRKACA											SESN1
229	HRK			PRKAG1											SESN3
230	HSPA1A			PRKAG2											CD24
231	HSPA1B			PRKAG3											ZBTB7A
232	HSPB1			PRKD1											MIR141
233	HTRA2			PRKN											ELANE
234	HTT			PSAP											KDR
235	HYAL2			PTPN22											MDM2
236	HYOU1			PYCARD											NFE2L2
237	ICAM1			QSOX1											ZEB1
238	IFI16			RAB39B											KL
239	IFI27			RAB3GAP1											PRKCI
240	IFI27L1			RAB3GAP2											CRYAB
241	IFI27L2			RAB7A											EPHB6
242	IFI6			RAB8A											FGF2
243	IFNB1			RALB											HK2
244	IFNG			RASIP1											LTF
245	IGF1			RB1CC1											IQGAP1
246	IKBKE			RETREG1											MGAT5
247	IL12A			RETREG3											SDCBP
248	IL19			RHEB											ABHD2
249	IL1A			RIPK2											SPIB
250	IL1B			RMC1											TRIM31
251	IL2			RNF152											MIR1827
252	IL20RA			RNF41											PDGFRB
253	IL33			RNF5											PLAT
254	IL4			ROCK1											TLR3
255	IL6R			RPTOR											NRAS
256	IL7			RRAGA											ROCK1
257	INCA1			RRAGB											PAK4
258	ING2			RRAGC											VEGFA
259	ING5			RRAGD											CASP10
260	INHBA			RUBCN											PIN1
261	INHBB			RUFY4											IL1RAP
262	INS			SCFD1											UBE2C
263	ITGA6			SCOC											YWHAZ
264	ITGAM			SEC22B											TWIST1
265	ITGAV			SESN1											BMP6
266	ITM2C			SESN2											BNIP3L
267	ITPR1			SESN3											ELK1
268	ITPRIP			SH3BP4											KDM3A
269	IVNS1ABP			SH3GLB1											PRDX4
270	JAK2			SIRT1											BNIP3
271	JMY			SIRT2											LMO3
272	JUN			SLC38A9											ZNF32
273	KDM1A			SMCR8											MIR200B
274	KITLG			SMG1											MIR525
275	KRT18			SNCA											MIR363
276	KRT8			SNRNP70											TUBB3
277	LCK			SNX32											HSP90B1
278	LGALS12			SNX5											SLC2A1
279	LGALS3			SNX6											HMOX1
280	LRRK2			SOGA1											PTPN11
281	LTBR			SOGA3											PRKACA
282	LY96			SPTLC1											PAK3
283	MADD			SPTLC2											CD36
284	MAEL			SQSTM1											PIK3R2
285	MAGEA3			SREBF1											PPP2CA
286	MAP2K5			SREBF2											CASP6
287	MAP3K5			STAT3											CDH3
288	MAPK7			STBD1											EEF2K
289	MAPK8			STING1											LRP1
290	MAPK8IP1			STK11											PAK2
291	MAPK8IP2			STUB1											PTK6
292	MAPK9			SUPT5H											LPAR1
293	MARCHF7			SVIP											TCF7L2
294	MAZ			SYNPO2											CEACAM1
295	MCL1			TAB2											GDF2
296	MDM2			TAB3											GLO1
297	MELK			TBC1D14											IL17A
298	MFF			TBC1D25											RBL2
299	MIF			TBK1											SIRPA
300	MIR132			TEX264											TRAF2
301	MIR15A			TFEB											ADCY10
302	MIR16-1			TICAM1											VPS37A
303	MIR17			TIGAR											TNFRSF12A
304	MIR198			TLK2											APOBEC3G
305	MIR21			TMEM150A											BAG1
306	MIR210			TMEM150B											COL13A1
307	MIR221			TMEM150C											MNX1
308	MIR222			TMEM39A											RAD9A
309	MIR26B			TMEM39B											IFI27
310	MIR27B			TMEM59											MEGF11
311	MIR449A			TOMM7											ITPRIP
312	MKNK2			TP53											BCL2L15
313	MLH1			TP53INP1											SNAI2
314	MLLT11			TP53INP2											PTPN1
315	MMP9			TPCN1											NOTCH3
316	MNT			TPCN2											GLUD1
317	MOAP1			TREM2											SIRT1
318	MPV17L			TRIB3											FASN
319	MSH2			TRIM13											MYH9
320	MSH6			TRIM14											RPS6KB1
321	MSX1			TRIM21											TPM1
322	MUC1			TRIM22											PPP2R1A
323	MUL1			TRIM27											COL4A2
324	MYBBP1A			TRIM34											CTNND1
325	NACC2			TRIM38											CD151
326	NANOS3			TRIM5											MMP11
327	NBN			TRIM6											ARHGEF7
328	NCK1			TRIM65											PPP2R2A
329	NCK2			TRIM68											SEMA7A
330	NDUFA13			TRIM8											PPP2R5A
331	NDUFS3			TRIML1											BST2
332	NFATC4			TRIML2											CCN1
333	NFE2L2			TSC1											PPP2R2D
334	NGF			TSC2											CCDC178
335	NGFR			TSPO											MIR10A
336	NKX3-1			UBA5											MIR30B
337	NLE1			UBQLN1											MIR30C1
338	NME5			UBQLN2											SHC1
339	NMT1			UBQLN4
340	NOC2L			UCHL1
341	NOG			UFC1
342	NOL3			UFL1
343	NONO			UFM1
344	NOS3			ULK1
345	NOX1			USP10
346	NR4A2			USP13
347	NUPR1			USP30
348	OPA1			USP33
349	P2RX4			USP36
350	P2RX7			UVRAG
351	P4HB			VDAC1
352	PAK2			VPS13C
353	PAK5			VPS13D
354	PARK7			VPS26A
355	PARP1			VPS26B
356	PARP2			VPS35
357	PAWR			WAC
358	PCGF2			WASHC1
359	PDCD10			WDFY3
360	PDCD5			WDR24
361	PDCD6			WDR41
362	PDIA3			WDR6
363	PDK1			WDR81
364	PDK2			WIPI2
365	PDPK1			ZC3H12A
366	PDX1			ZKSCAN3
367	PEA15			ZMPSTE24
368	PELI3
369	PERP
370	PF4
371	PHIP
372	PHLDA3
373	PIAS4
374	PIDD1
375	PIH1D1
376	PIK3R1
377	PINK1
378	PLAGL2
379	PLAUR
380	PLEKHF1
381	PLSCR3
382	PMAIP1
383	PML
384	POLB
385	POU4F1
386	POU4F2
387	PPARD
388	PPIA
389	PPIF
390	PPM1F
391	PPP1CA
392	PPP1R13B
393	PPP1R15A
394	PPP2R1B
395	PPP3CC
396	PPP3R1
397	PRDX2
398	PRELID1
399	PRKCA
400	PRKCD
401	PRKDC
402	PRKN
403	PRKRA
404	PRODH
405	PSEN1
406	PSMD10
407	PSME3
408	PTEN
409	PTGIS
410	PTH
411	PTPMT1
412	PTPN1
413	PTPN2
414	PTPRC
415	PTTG1IP
416	PYCARD
417	QARS1
418	RACK1
419	RAF1
420	RB1
421	RB1CC1
422	RBCK1
423	RELA
424	RET
425	RFFL
426	RHOT1
427	RHOT2
428	RIPK1
429	RIPK3
430	RNF183
431	RNF186
432	RNF34
433	RNF41
434	RPL11
435	RPL26
436	RPS27L
437	RPS3
438	RPS6KB1
439	RPS7
440	RRP8
441	RTKN2
442	RTL10
443	S100A8
444	S100A9
445	SCG2
446	SCN2A
447	SCRT2
448	SELENOK
449	SELENOS
450	SENP1
451	SEPTIN4
452	SERINC3
453	SERPINE1
454	SFN
455	SFPQ
456	SFRP1
457	SFRP2
458	SGMS1
459	SGPL1
460	SGPP1
461	SH3RF1
462	SHH
463	SHISA5
464	SIAH1
465	SIAH2
466	SIRT1
467	SIVA1
468	SKIL
469	SLC25A5
470	SLC35F6
471	SLC9A3R1
472	SMAD3
473	SNAI1
474	SNAI2
475	SNW1
476	SOD1
477	SOD2
478	SORT1
479	SP100
480	SRC
481	SRPX
482	SST
483	SSTR3
484	ST20
485	STK11
486	STK24
487	STK25
488	STK3
489	STK4
490	STRADB
491	STX4
492	STYXL1
493	SYVN1
494	TAF9
495	TAF9B
496	TCF7L2
497	TERT
498	TFDP1
499	TFDP2
500	TFPT
501	TGFB1
502	TGFB2
503	TGFBR1
504	THBS1
505	TICAM1
506	TICAM2
507	TIMM50
508	TIMP3
509	TLR3
510	TLR4
511	TM2D1
512	TMBIM1
513	TMBIM6
514	TMC8
515	TMEM102
516	TMEM109
517	TMEM117
518	TMEM14A
519	TMEM161A
520	TNF
521	TNFAIP3
522	TNFRSF10A
523	TNFRSF10B
524	TNFRSF10C
525	TNFRSF12A
526	TNFRSF1A
527	TNFRSF1B
528	TNFRSF25
529	TNFSF10
530	TNFSF12
531	TOPORS
532	TP53
533	TP53BP2
534	TP63
535	TP73
536	TPD52L1
537	TPT1
538	TRADD
539	TRAF1
540	TRAF2
541	TRAF7
542	TRAP1
543	TRIAP1
544	TRIB3
545	TRIM32
546	TRIM39
547	TXNDC12
548	TYROBP
549	UACA
550	UBB
551	UBE2K
552	UBE4B
553	UBQLN1
554	UMOD
555	UNC5B
556	URI1
557	USP28
558	USP47
559	VDAC2
560	VNN1
561	WDR35
562	WNT4
563	WWOX
564	XBP1
565	YAP1
566	YBX3
567	YWHAB
568	YWHAE
569	YWHAG
570	YWHAH
571	YWHAQ
572	YWHAZ
573	ZC3HC1
574	ZDHHC3
575	ZMYND11
576	ZNF205
577	ZNF385A
578	ZNF385B
579	ZNF622
580	ZSWIM2
