# Supplementary material for: Integrated machine learning survival framework develops a prognostic model based on inter-crosstalk definition of mitochondrial function and cell death patterns in a large multicenter cohort for lower-grade glioma
Source: J Transl Med. 2023 Sep 2;21:588. doi: 10.1186/s12967-023-04468-x (PMC10474752; doi:10.1186/s12967-023-04468-x)
Supplement: Supplementary file 10 — Additional file 10: The information of 1136 genes related to mitochondrion. [file 12967_2023_4468_MOESM10_ESM.xlsx]

## Sheet: Sheet4
AADAT
AARS2
AASS
ABAT
ABCA9
ABCB10
ABCB6
ABCB7
ABCB8
ABCD1
ABCD2
ABCD3
ABHD10
ABHD11
ACAA1
ACAA2
ACACA
ACACB
ACAD10
ACAD11
ACAD8
ACAD9
ACADL
ACADM
ACADS
ACADSB
ACADVL
ACAT1
ACCS
ACLY
ACO2
ACOD1
ACOT11
ACOT13
ACOT2
ACOT7
ACOT9
ACP6
ACSF2
ACSF3
ACSL1
ACSL6
ACSM1
ACSM2A
ACSM2B
ACSM3
ACSM4
ACSM5
ACSS1
ACSS3
ADCK1
ADCK2
ADCK5
ADCY10
ADHFE1
AFG1L
AFG3L2
AGK
AGMAT
AGPAT4
AGPAT5
AGXT
AGXT2
AHCYL1
AIFM1
AIFM2
AIFM3
AK2
AK3
AK4
AKAP1
AKAP10
AKR1B10
AKR7A2
ALAS1
ALAS2
ALDH18A1
ALDH1B1
ALDH1L1
ALDH1L2
ALDH2
ALDH3A2
ALDH4A1
ALDH5A1
ALDH6A1
ALDH7A1
ALDH9A1
ALKBH1
ALKBH7
AMACR
AMT
ANGEL2
ANTKMT
APEX1
APOO
APOOL
ARF5
ARG2
ARL2
ARMC10
ARMCX1
ARMCX2
ARMCX3
ARMCX6
ATAD1
ATAD3A
ATAD3B
ATP23
ATP5F1A
ATP5F1B
ATP5F1C
ATP5F1D
ATP5F1E
ATP5IF1
ATP5MC1
ATP5MC2
ATP5MC3
ATP5MD
ATP5ME
ATP5MF
ATP5MF-PTCD1
ATP5MG
ATP5MPL
ATP5PB
ATP5PD
ATP5PF
ATP5PO
ATPAF1
ATPAF2
ATPSCKMT
AUH
AURKAIP1
BAD
BAK1
BAX
BBC3
BCAT2
BCKDHA
BCKDHB
BCKDK
BCL2
BCL2A1
BCL2L1
BCL2L10
BCL2L11
BCL2L13
BCL2L2
BCO2
BCS1L
BDH1
BID
BIK
BLOC1S1
BNIP3
BNIP3L
BOK
BOLA1
BOLA3
BPHL
C12orf65
C15orf48
C15orf61
C16orf91
C1QBP
C2orf69
C3orf33
C5orf63
C6orf136
C8orf82
CA5A
CA5B
CARS2
CASP3
CASP8
CASP9
CAT
CBR3
CBR4
CCDC127
CCDC51
CCDC58
CCDC90B
CDK5RAP1
CEP89
CHCHD1
CHCHD10
CHCHD2
CHCHD3
CHCHD4
CHCHD5
CHCHD6
CHCHD7
CHDH
CHPT1
CISD1
CISD3
CKMT1A
CKMT1B
CKMT2
CLPB
CLPP
CLPX
CLYBL
CMC1
CMC2
CMC4
CMPK2
COA1
COA3
COA4
COA5
COA6
COA7
COA8
COASY
COMT
COMTD1
COQ10A
COQ10B
COQ2
COQ3
COQ4
COQ5
COQ6
COQ7
COQ8A
COQ8B
COQ9
COX10
COX11
COX14
COX15
COX16
COX17
COX18
COX19
COX20
COX4I1
COX4I2
COX5A
COX5B
COX6A1
COX6A2
COX6B1
COX6B2
COX6C
COX7A1
COX7A2
COX7A2L
COX7B
COX7B2
COX7C
COX8A
COX8C
CPOX
CPS1
CPT1A
CPT1B
CPT1C
CPT2
CRAT
CRLS1
CROT
CRY1
CRYZ
CS
CSKMT
CYB5B
CYB5R3
CYC1
CYCS
CYP11A1
CYP11B1
CYP11B2
CYP24A1
CYP27A1
CYP27B1
D2HGDH
DAP3
DARS2
DBI
DBT
DCAKD
DCXR
DDX28
DECR1
DELE1
DGLUCY
DGUOK
DHODH
DHRS1
DHRS2
DHRS4
DHRS7B
DHTKD1
DHX30
DIABLO
DLAT
DLD
DLST
DMAC1
DMAC2
DMAC2L
DMGDH
DMPK
DNA2
DNAJA3
DNAJC11
DNAJC15
DNAJC19
DNAJC28
DNAJC30
DNAJC4
DNLZ
DNM1L
DTYMK
DUS2
DUT
EARS2
ECH1
ECHDC1
ECHDC2
ECHDC3
ECHS1
ECI1
ECI2
ECSIT
EFHD1
EHHADH
ELAC2
ENDOG
EPHX2
ERAL1
ETFA
ETFB
ETFBKMT
ETFDH
ETFRF1
ETHE1
EXD2
EXOG
FABP1
FAHD1
FAHD2A
FAM136A
FAM162A
FAM185A
FAM210A
FAM210B
FARS2
FASN
FASTK
FASTKD1
FASTKD2
FASTKD3
FASTKD5
FBXL4
FDPS
FDX1
FDX2
FDXR
FECH
FH
FHIT
FIS1
FKBP10
FKBP8
FLAD1
FMC1
FOXRED1
FPGS
FTH1
FTMT
FUNDC1
FUNDC2
FXN
GADD45GIP1
GARS1
GATB
GATC
GATD3A
GATM
GCAT
GCDH
GCSH
GDAP1
GFER
GFM1
GFM2
GHITM
GLDC
GLOD4
GLRX2
GLRX5
GLS
GLS2
GLUD1
GLUD2
GLYAT
GLYCTK
GOLPH3
GOT2
GPAM
GPAT2
GPD2
GPT2
GPX1
GPX4
GRHPR
GRPEL1
GRPEL2
GRSF1
GSR
GSTK1
GSTZ1
GTPBP10
GTPBP3
GTPBP6
GUF1
GUK1
HADH
HADHA
HADHB
HAGH
HAO2
HARS2
HCCS
HDHD3
HDHD5
HEBP1
HEMK1
HIBADH
HIBCH
HIGD1A
HIGD2A
HINT1
HINT2
HINT3
HMGCL
HMGCS2
HOGA1
HPDL
HSCB
HSD17B10
HSD17B4
HSD17B8
HSDL1
HSDL2
HSPA9
HSPD1
HSPE1
HTATIP2
HTD2
HTRA2
IARS2
IBA57
IDE
IDH2
IDH3A
IDH3B
IDH3G
IDI1
IFI27
IMMP1L
IMMP2L
IMMT
ISCA1
ISCA2
ISCU
ISOC2
IVD
KARS1
KMO
KYAT3
L2HGDH
LACTB
LACTB2
LAP3
LARS2
LDHAL6B
LDHB
LDHD
LETM1
LETM2
LETMD1
LIAS
LIG3
LIPT1
LIPT2
LONP1
LRPPRC
LYPLA1
LYPLAL1
LYRM1
LYRM2
LYRM4
LYRM7
LYRM9
MACROD1
MAIP1
MALSU1
MAOA
MAOB
MARCHF5
MARS2
MAVS
MCAT
MCCC1
MCCC2
MCCD1
MCEE
MCL1
MCRIP2
MCU
MCUB
MCUR1
MDH2
ME2
ME3
MECR
METAP1D
METTL15
METTL17
METTL4
METTL5
METTL8
MFF
MFN1
MFN2
MGARP
MGME1
MGST1
MGST3
MICOS10
MICOS13
MICU1
MICU2
MICU3
MIEF1
MIEF2
MIGA1
MIGA2
MIPEP
MLYCD
MMAA
MMAB
MMADHC
MMUT
MOCS1
MPC1
MPC1L
MPC2
MPST
MPV17
MPV17L
MPV17L2
MRM1
MRM2
MRM3
MRPL1
MRPL10
MRPL11
MRPL12
MRPL13
MRPL14
MRPL15
MRPL16
MRPL17
MRPL18
MRPL19
MRPL2
MRPL20
MRPL21
MRPL22
MRPL23
MRPL24
MRPL27
MRPL28
MRPL3
MRPL30
MRPL32
MRPL33
MRPL34
MRPL35
MRPL36
MRPL37
MRPL38
MRPL39
MRPL4
MRPL40
MRPL41
MRPL42
MRPL43
MRPL44
MRPL45
MRPL46
MRPL47
MRPL48
MRPL49
MRPL50
MRPL51
MRPL52
MRPL53
MRPL54
MRPL55
MRPL57
MRPL58
MRPL9
MRPS10
MRPS11
MRPS12
MRPS14
MRPS15
MRPS16
MRPS17
MRPS18A
MRPS18B
MRPS18C
MRPS2
MRPS21
MRPS22
MRPS23
MRPS24
MRPS25
MRPS26
MRPS27
MRPS28
MRPS30
MRPS31
MRPS33
MRPS34
MRPS35
MRPS36
MRPS5
MRPS6
MRPS7
MRPS9
MRRF
MRS2
MSRA
MSRB2
MSRB3
MTARC1
MTARC2
MT-ATP6
MT-ATP8
MTCH1
MTCH2
MT-CO1
MT-CO2
MT-CO3
MT-CYB
MTERF1
MTERF2
MTERF3
MTERF4
MTFMT
MTFP1
MTFR1
MTFR1L
MTFR2
MTG1
MTG2
MTHFD1L
MTHFD2
MTHFD2L
MTHFS
MTIF2
MTIF3
MT-ND1
MT-ND2
MT-ND3
MT-ND4
MT-ND4L
MT-ND5
MT-ND6
MTO1
MTPAP
MTRES1
MTRF1
MTRF1L
MTX1
MTX2
MTX3
MUL1
MUTYH
MYG1
MYO19
NADK2
NAGS
NARS2
NAT8L
NAXD
NAXE
NBR1
NDUFA1
NDUFA10
NDUFA11
NDUFA12
NDUFA13
NDUFA2
NDUFA3
NDUFA4
NDUFA5
NDUFA6
NDUFA7
NDUFA8
NDUFA9
NDUFAB1
NDUFAF1
NDUFAF2
NDUFAF3
NDUFAF4
NDUFAF5
NDUFAF6
NDUFAF7
NDUFAF8
NDUFB1
NDUFB10
NDUFB11
NDUFB2
NDUFB3
NDUFB4
NDUFB5
NDUFB6
NDUFB7
NDUFB8
NDUFB9
NDUFC1
NDUFC2
NDUFS1
NDUFS2
NDUFS3
NDUFS4
NDUFS5
NDUFS6
NDUFS7
NDUFS8
NDUFV1
NDUFV2
NDUFV3
NEU4
NFS1
NFU1
NGRN
NIF3L1
NIPSNAP1
NIPSNAP2
NIPSNAP3A
NIPSNAP3B
NIT1
NIT2
NLN
NLRX1
NME3
NME4
NME6
NMNAT3
NNT
NOA1
NOCT
NRDC
NSUN2
NSUN3
NSUN4
NT5DC2
NT5DC3
NT5M
NTHL1
NUBPL
NUDT13
NUDT19
NUDT2
NUDT5
NUDT6
NUDT8
NUDT9
OAT
OCIAD1
OCIAD2
OGDH
OGDHL
OGG1
OMA1
OPA1
OPA3
OSBPL1A
OSGEPL1
OTC
OXA1L
OXCT1
OXCT2
OXLD1
OXNAD1
OXR1
OXSM
PABPC5
PAICS
PAM16
PANK2
PARK7
PARL
PARS2
PC
PCBD2
PCCA
PCCB
PCK2
PDE12
PDE2A
PDF
PDHA1
PDHA2
PDHB
PDHX
PDK1
PDK2
PDK3
PDK4
PDP1
PDP2
PDPR
PDSS1
PDSS2
PET100
PET117
PEX11B
PGAM5
PGS1
PHB
PHB2
PHYH
PICK1
PIF1
PIGBOS1
PINK1
PISD
PITRM1
PLD6
PLGRKT
PLPBP
PLSCR3
PMAIP1
PMPCA
PMPCB
PNKD
PNPLA8
PNPO
PNPT1
POLB
POLDIP2
POLG
POLG2
POLQ
POLRMT
PPA2
PPIF
PPM1K
PPOX
PPTC7
PRDX2
PRDX3
PRDX4
PRDX5
PRDX6
PRELID1
PRELID2
PRELID3A
PRELID3B
PREPL
PRIMPOL
PRKACA
PRKN
PRODH
PRODH2
PRORP
PRSS35
PRXL2A
PTCD1
PTCD2
PTCD3
PTGES2
PTPMT1
PTRH1
PTRH2
PUS1
PUSL1
PXMP2
PXMP4
PYCR1
PYCR2
PYURF
QDPR
QRSL1
QTRT1
RAB24
RAB5IF
RARS2
RBFA
RCC1L
RDH13
RDH14
RECQL4
REXO2
RFK
RHOT1
RHOT2
RIDA
RMDN1
RMDN3
RMND1
RNASEH1
ROMO1
RP11_469A15.2
RPIA
RPUSD3
RPUSD4
RSAD1
RTL10
RTN4IP1
SAMM50
SARDH
SARS2
SCO1
SCO2
SCP2
SDHA
SDHAF1
SDHAF2
SDHAF3
SDHAF4
SDHB
SDHC
SDHD
SDR39U1
SDSL
SELENOO
SEPTIN4
SERAC1
SERHL2
SETD9
SFXN1
SFXN2
SFXN3
SFXN4
SFXN5
SHMT2
SIRT3
SIRT4
SIRT5
SLC25A1
SLC25A10
SLC25A11
SLC25A12
SLC25A13
SLC25A14
SLC25A15
SLC25A16
SLC25A18
SLC25A19
SLC25A20
SLC25A21
SLC25A22
SLC25A23
SLC25A24
SLC25A25
SLC25A26
SLC25A27
SLC25A28
SLC25A29
SLC25A3
SLC25A30
SLC25A31
SLC25A32
SLC25A33
SLC25A34
SLC25A35
SLC25A36
SLC25A37
SLC25A38
SLC25A39
SLC25A4
SLC25A40
SLC25A41
SLC25A42
SLC25A43
SLC25A44
SLC25A45
SLC25A46
SLC25A47
SLC25A48
SLC25A5
SLC25A51
SLC25A52
SLC25A53
SLC25A6
SLC30A9
SLC8B1
SLIRP
SMDT1
SMIM20
SMIM8
SNAP29
SND1
SOD1
SOD2
SPATA19
SPATA20
SPG7
SPHK2
SPHKAP
SPIRE1
SPR
SPRYD4
SPTLC2
SQOR
SSBP1
STAR
STARD7
STOM
STOML2
STX17
STYXL1
SUCLA2
SUCLG1
SUCLG2
SUGCT
SUOX
SUPV3L1
SURF1
SYNJ2BP
TACO1
TAMM41
TARS2
TAZ
TBRG4
TCAIM
TDRKH
TEFM
TFAM
TFB1M
TFB2M
THEM4
THEM5
THG1L
THNSL1
TIMM10
TIMM10B
TIMM13
TIMM17A
TIMM17B
TIMM21
TIMM22
TIMM23
TIMM29
TIMM44
TIMM50
TIMM8A
TIMM8B
TIMM9
TIMMDC1
TK2
TMEM11
TMEM126A
TMEM126B
TMEM143
TMEM14C
TMEM177
TMEM186
TMEM205
TMEM65
TMEM70
TMLHE
TOMM20
TOMM20L
TOMM22
TOMM34
TOMM40
TOMM40L
TOMM5
TOMM6
TOMM7
TOMM70
TOP1MT
TOP3A
TRAP1
TRIAP1
TRIT1
TRMT1
TRMT10C
TRMT2B
TRMT5
TRMT61B
TRMU
TRNT1
TRUB2
TSFM
TSPO
TST
TSTD1
TSTD3
TTC19
TUFM
TWNK
TXN2
TXNRD1
TXNRD2
UCP1
UCP2
UCP3
UNG
UQCC1
UQCC2
UQCC3
UQCR10
UQCR11
UQCRB
UQCRC1
UQCRC2
UQCRFS1
UQCRH
UQCRQ
USP30
VARS2
VDAC1
VDAC2
VDAC3
VPS13D
VWA8
WARS2
XPNPEP3
YARS2
YBEY
YME1L1
YRDC
ZADH2
