# Supplementary material for: Integrated machine learning survival framework develops a prognostic model based on inter-crosstalk definition of mitochondrial function and cell death patterns in a large multicenter cohort for lower-grade glioma
Source: J Transl Med. 2023 Sep 2;21:588. doi: 10.1186/s12967-023-04468-x (PMC10474752; doi:10.1186/s12967-023-04468-x)
Supplement: Supplementary file 11 — Additional file 11: Intersection genes obtained from Wayne diagram. [file 12967_2023_4468_MOESM11_ESM.xlsx]

## Sheet: edges_ceRNA_cytoscape
DTYMK
BRMS1
CD63
MRPL24
AATF
ECHDC2
MTPAP
ACACB
AP3M1
EEF1A1
COA4
CDK4
NONO
GUK1
C6orf136
ADCK5
ATF6
DYRK2
MSH6
IGF2R
NIPSNAP3B
HDHD3
OCIAD2
ACAA2
DEDD2
MAP1LC3A
ATP5MPL
FKBP8
COX7A1
CHCHD10
PAK2
BACH1
ATP7A
PIN1
CDKN2D
ERCC4
NCOA4
PIK3CA
EIF2AK3
PABPC5
KLF12
BAX
PBK
MELK
GNAI3
E2F2
DDIAS
PELI3
BIRC5
BRCA1
BRCA2
KIF2C
FANCD2
ABCD3
NRAS
BCL10
DRAM2
NDUFB8
ITGB1
DARS2
MAPK3
FER
ATP13A2
ATAD3B
CPT1B
GSDMB
MRPS16
PICK1
MARK4
BDH1
AIFM3
CKMT1B
CKMT1A
CYP11A1
FBXW7
ATP6V1H
EPHB6
ITPR1
MTUS2
MAPK8IP2
GOT1
EEF1A2
PAK1
CCK
CAMK2B
DBH
MOAP1
OLFM3
CRH
CPLX2
PARS2
PDE2A
CAMKK2
ATP6V0A1
GIT1
AP3B2
ACOT7
MICU3
NAGA
MADD
BRSK2
NPC2
ANXA5
CASP1
IDS
DHTKD1
NUDT5
MYC
GDNF
OGDHL
OSBPL1A
NAT8L
GLS
LGALS8
CHAC1
NME5
LAPTM5
CYBB
CTSS
CD44
HAVCR2
PIK3CG
CRLS1
ACADVL
AMT
ATP6V0C
LAT
GPX1
MAN2B1
HSD17B10
MTFR2
EZH2
ATP6V0E1
DNASE2
HERC1
ALDH1L2
MEGF11
HTATIP2
MAOB
MCUB
PDIA3
HMOX1
CD300A
CTSC
LGALS9
CD4
LAT2
CD14
MILR1
CD74
CASP5
BTK
LY96
FBXL2
ATP6V1B1
ANGPTL2
CKMT2
KMO
LZTS1
LAP3
JAK3
MGME1
ABCD1
PDP1
NDEL1
ELK1
ITPRIP
BCL2A1
IL18
HSPA5
NBR1
HNRNPK
CBL
CTSL
EIF2AK2
MTDH
CALR
CD84
HK2
IFNGR1
CX3CR1
IFI16
CSF1
PIK3CD
IL17RA
NAGPA
MAPK11
MICOS10
GSK3A
ASAH1
ATP6V1E1
ABCB7
ACLY
NBN
AR
MRPL42
MPST
APEX1
LAPTM4B
PDE12
LAPTM4A
CXCR4
GM2A
IKBKE
CPT1C
CD38
LIPA
ABCB9
FADS2
BCL2L2
HADHA
NOTCH1
MCL1
ACVR1
GNS
