# Supplementary material for: Integrated machine learning survival framework develops a prognostic model based on inter-crosstalk definition of mitochondrial function and cell death patterns in a large multicenter cohort for lower-grade glioma
Source: J Transl Med. 2023 Sep 2;21:588. doi: 10.1186/s12967-023-04468-x (PMC10474752; doi:10.1186/s12967-023-04468-x)
Supplement: Supplementary file 13 — Additional file 13: The performance of 101 predictive models in training and testing cohorts. [file 12967_2023_4468_MOESM13_ESM.xlsx]

## Sheet: Sheet1
Supplementary Table 5: The performance of 101 predictive models in training and testing cohorts.
Model	TCGA	CGGA325	CGGA693	GSE16011	E-MTAB-3892	Rembrandt
RSF	0.951945	0.747547	0.708315	0.727039	0.69154	0.722536
StepCox[both]+RSF	0.950713	0.742832	0.719577	0.722694	0.689324	0.701379
StepCox[backward]+RSF	0.949808	0.743794	0.722792	0.721114	0.688955	0.699499
CoxBoost+RSF	0.945173	0.744757	0.724301	0.713411	0.663835	0.710939
Lasso+RSF	0.941298	0.741004	0.708117	0.705313	0.684891	0.714073
StepCox[forward]	0.927066	0.562151	0.532664	0.590164	0.526413	0.558612
StepCox[backward]	0.919932	0.61016	0.586011	0.567648	0.499815	0.577417
StepCox[both]	0.919932	0.61016	0.586011	0.567648	0.499815	0.577417
StepCox[backward]+GBM	0.912255	0.743121	0.695651	0.716374	0.63502	0.698558
StepCox[backward]+Ridge	0.90675	0.672984	0.663032	0.633616	0.581455	0.632424
StepCox[both]+Ridge	0.90675	0.672984	0.663032	0.633616	0.581455	0.632424
StepCox[backward]+Enet[alpha=0.3]	0.902549	0.692419	0.68288	0.648035	0.596232	0.642297
GBM	0.90063	0.735617	0.706967	0.715386	0.682305	0.733662
CoxBoost+GBM	0.897733	0.733789	0.720601	0.714201	0.646103	0.713916
StepCox[both]+GBM	0.892591	0.738984	0.697879	0.721904	0.637606	0.70561
StepCox[both]+CoxBoost	0.887847	0.723109	0.713775	0.667588	0.65386	0.676618
plsRcox	0.885312	0.688089	0.642358	0.704325	0.608792	0.665178
Lasso+GBM	0.884008	0.726188	0.697448	0.707881	0.674178	0.724573
StepCox[backward]+plsRcox	0.882523	0.723783	0.688682	0.650207	0.637237	0.65985
StepCox[both]+plsRcox	0.882523	0.723783	0.688682	0.650207	0.637237	0.65985
RSF+GBM	0.878576	0.714932	0.697034	0.705906	0.680458	0.719401
StepCox[backward]+CoxBoost	0.863511	0.760727	0.688664	0.707486	0.68526	0.700282
CoxBoost+Enet[alpha=0.5]	0.850221	0.726477	0.693514	0.702153	0.605837	0.707648
CoxBoost+StepCox[forward]	0.850112	0.714643	0.694628	0.686549	0.590321	0.69229
CoxBoost+Lasso	0.849859	0.725419	0.692167	0.70235	0.606945	0.708901
CoxBoost+Enet[alpha=0.2]	0.849786	0.731191	0.694466	0.709658	0.613594	0.712819
CoxBoost+Ridge	0.84899	0.729074	0.695454	0.712818	0.62246	0.714386
CoxBoost+plsRcox	0.845405	0.728016	0.703627	0.709856	0.649797	0.709215
Enet[alpha=0.5]	0.844898	0.73629	0.689472	0.731977	0.6413	0.730058
Enet[alpha=0.1]	0.844535	0.743602	0.703644	0.738692	0.661987	0.725827
CoxBoost+StepCox[backward]	0.844246	0.704349	0.690011	0.670354	0.580717	0.676932
CoxBoost+StepCox[both]	0.844246	0.704349	0.690011	0.670354	0.580717	0.676932
Enet[alpha=0.3]	0.842652	0.738888	0.691179	0.735137	0.649427	0.728021
Lasso+StepCox[forward]	0.840624	0.711949	0.673989	0.714596	0.643147	0.712663
Enet[alpha=0.2]	0.840588	0.737733	0.693244	0.735532	0.657185	0.725357
Ridge	0.839828	0.758515	0.716254	0.74758	0.682675	0.725513
Lasso+plsRcox	0.839176	0.734558	0.670038	0.704918	0.680089	0.712192
Lasso	0.838234	0.734077	0.685521	0.731385	0.633912	0.72473
Enet[alpha=0.6]	0.836749	0.737733	0.68509	0.732965	0.651274	0.724103
Lasso+CoxBoost	0.836061	0.729652	0.675193	0.714794	0.639823	0.720655
Enet[alpha=0.7]	0.835808	0.736386	0.68473	0.73099	0.646472	0.723633
Enet[alpha=0.8]	0.835627	0.735424	0.684048	0.731187	0.642778	0.724573
Enet[alpha=0.9]	0.835011	0.734847	0.68412	0.73178	0.643517	0.725357
Enet[alpha=0.4]	0.834504	0.738118	0.685233	0.727434	0.650905	0.725513
Lasso+survivalSVM	0.833997	0.737156	0.682288	0.715584	0.664204	0.7147
Lasso+StepCox[backward]	0.833671	0.713104	0.67284	0.711831	0.65386	0.702006
Lasso+StepCox[both]	0.833671	0.713104	0.67284	0.711831	0.65386	0.702006
CoxBoost	0.830992	0.735713	0.684623	0.725262	0.639453	0.72473
RSF+plsRcox	0.828384	0.691264	0.672103	0.716571	0.592538	0.728177
RSF+Ridge	0.828348	0.717914	0.683024	0.716571	0.642039	0.726297
RSF+Enet[alpha=0.1]	0.827551	0.706946	0.683437	0.716966	0.617289	0.722066
RSF+Enet[alpha=0.5]	0.825849	0.693573	0.682665	0.719731	0.59734	0.722536
RSF+Enet[alpha=0.8]	0.825487	0.691649	0.682701	0.719929	0.591799	0.722849
CoxBoost+survivalSVM	0.825415	0.737733	0.68888	0.703535	0.652013	0.708901
RSF+Enet[alpha=0.4]	0.825415	0.69848	0.683419	0.720916	0.599926	0.721439
RSF+Enet[alpha=0.2]	0.825234	0.707716	0.685269	0.719534	0.617658	0.720498
RSF+Enet[alpha=0.9]	0.824908	0.693958	0.682683	0.720521	0.589583	0.721909
RSF+StepCox[forward]	0.824908	0.662113	0.67645	0.706498	0.56594	0.717051
Lasso+SuperPC	0.824364	0.731672	0.674977	0.714004	0.639084	0.713446
RSF+StepCox[backward]	0.824328	0.636136	0.667164	0.708078	0.567787	0.719715
RSF+StepCox[both]	0.824328	0.636136	0.667164	0.708078	0.567787	0.719715
RSF+Enet[alpha=0.3]	0.824147	0.714547	0.68667	0.715189	0.620983	0.723006
RSF+Enet[alpha=0.6]	0.822445	0.712623	0.685413	0.716374	0.611008	0.721125
RSF+CoxBoost	0.821323	0.722244	0.685233	0.713806	0.602881	0.726454
RSF+survivalSVM	0.817448	0.722917	0.691376	0.717559	0.677872	0.730058
RSF+Enet[alpha=0.7]	0.816434	0.734174	0.686509	0.712226	0.65386	0.719245
RSF+SuperPC	0.81379	0.711276	0.686078	0.711238	0.683413	0.735543
RSF+Lasso	0.812595	0.733308	0.679288	0.706893	0.643886	0.71611
CoxBoost+SuperPC	0.808322	0.744564	0.674564	0.69445	0.637976	0.693543
StepCox[backward]+survivalSVM	0.806294	0.760727	0.686096	0.715979	0.683044	0.688372
StepCox[both]+survivalSVM	0.806294	0.760727	0.686096	0.715979	0.683044	0.688372
SuperPC	0.800934	0.745526	0.676181	0.711831	0.67307	0.699655
StepCox[backward]+SuperPC	0.796444	0.753415	0.683204	0.716176	0.69819	0.689469
survivalSVM	0.793836	0.768617	0.692239	0.724867	0.663096	0.690096
StepCox[both]+SuperPC	0.78558	0.727728	0.664164	0.69998	0.673809	0.697931
CoxBoost+Enet[alpha=0.1]	0.5	0.5	0.5	0.5	0.5	0.5
CoxBoost+Enet[alpha=0.3]	0.5	0.5	0.5	0.5	0.5	0.5
CoxBoost+Enet[alpha=0.4]	0.5	0.5	0.5	0.5	0.5	0.5
CoxBoost+Enet[alpha=0.6]	0.5	0.5	0.5	0.5	0.5	0.5
CoxBoost+Enet[alpha=0.7]	0.5	0.5	0.5	0.5	0.5	0.5
CoxBoost+Enet[alpha=0.8]	0.5	0.5	0.5	0.5	0.5	0.5
CoxBoost+Enet[alpha=0.9]	0.5	0.5	0.5	0.5	0.5	0.5
StepCox[backward]+Enet[alpha=0.1]	0.5	0.5	0.5	0.5	0.5	0.5
StepCox[backward]+Enet[alpha=0.2]	0.5	0.5	0.5	0.5	0.5	0.5
StepCox[backward]+Enet[alpha=0.4]	0.5	0.5	0.5	0.5	0.5	0.5
StepCox[backward]+Enet[alpha=0.5]	0.5	0.5	0.5	0.5	0.5	0.5
StepCox[backward]+Enet[alpha=0.6]	0.5	0.5	0.5	0.5	0.5	0.5
StepCox[backward]+Enet[alpha=0.7]	0.5	0.5	0.5	0.5	0.5	0.5
StepCox[backward]+Enet[alpha=0.8]	0.5	0.5	0.5	0.5	0.5	0.5
StepCox[backward]+Enet[alpha=0.9]	0.5	0.5	0.5	0.5	0.5	0.5
StepCox[backward]+Lasso	0.5	0.5	0.5	0.5	0.5	0.5
StepCox[both]+Enet[alpha=0.1]	0.5	0.5	0.5	0.5	0.5	0.5
StepCox[both]+Enet[alpha=0.2]	0.5	0.5	0.5	0.5	0.5	0.5
StepCox[both]+Enet[alpha=0.3]	0.5	0.5	0.5	0.5	0.5	0.5
StepCox[both]+Enet[alpha=0.4]	0.5	0.5	0.5	0.5	0.5	0.5
StepCox[both]+Enet[alpha=0.5]	0.5	0.5	0.5	0.5	0.5	0.5
StepCox[both]+Enet[alpha=0.6]	0.5	0.5	0.5	0.5	0.5	0.5
StepCox[both]+Enet[alpha=0.7]	0.5	0.5	0.5	0.5	0.5	0.5
StepCox[both]+Enet[alpha=0.8]	0.5	0.5	0.5	0.5	0.5	0.5
StepCox[both]+Enet[alpha=0.9]	0.5	0.5	0.5	0.5	0.5	0.5
StepCox[both]+Lasso	0.5	0.5	0.5	0.5	0.5	0.5
