# Supplementary material for: Integrated machine learning survival framework develops a prognostic model based on inter-crosstalk definition of mitochondrial function and cell death patterns in a large multicenter cohort for lower-grade glioma
Source: J Transl Med. 2023 Sep 2;21:588. doi: 10.1186/s12967-023-04468-x (PMC10474752; doi:10.1186/s12967-023-04468-x)
Supplement: Supplementary file 16 — Additional file 16: Shown for chemotherapeutic agents with low and high mtPCDI groups using the “oncoPredict”. [file 12967_2023_4468_MOESM16_ESM.xlsx]

## Sheet: Sheet1
drug	avg1	avg2	p	fc	log2fc
Lisitinib	1.36307	2.5817	0.000390012	1.89403	0.92146
LFM.A13	4.12121	4.54748	0.00556471	1.10343	0.141997
STF.62247	2.64134	3.19802	0.00706847	1.21076	0.275909
BMS.754807	0.425251	1.67639	0.00890998	3.94212	1.97897
Bryostatin.1	-3.35187	-2.91939	0.0138072	0.870975	-0.199297
KIN001.266	2.99361	2.54682	0.0138072	0.850754	-0.233187
BMS.509744	2.56821	3.64162	0.0169877	1.41796	0.503815
TAK.715	2.44302	2.94923	0.0169877	1.20721	0.271672
GSK1904529A	1.78288	2.07351	0.0207672	1.16301	0.217865
Cetuximab	6.01222	6.29913	0.0207672	1.04772	0.0672543
MP470	2.77658	3.13005	0.025202	1.1273	0.172875
TL.1.85	2.40207	1.23017	0.0303928	0.512128	-0.965422
QS11	2.274	2.82238	0.0364159	1.24115	0.31168
Rapamycin	-3.34945	-2.52517	0.051353	0.753906	-0.407544
GNF.2	1.93536	2.41013	0.051353	1.24531	0.31651
QL.X.138	-1.25826	-0.340139	0.051353	0.270326	-1.88723
Nilotinib	3.10192	2.17862	0.051353	0.702344	-0.50975
JNJ.26854165	2.95621	2.55235	0.051353	0.863387	-0.211921
SGC0946	1.16848	1.27314	0.051353	1.08958	0.123768
Parthenolide	2.22684	2.51217	0.060468	1.12813	0.173937
Thapsigargin	-5.27989	-3.71113	0.060468	0.70288	-0.508649
CP724714	3.53122	3.81363	0.060468	1.07997	0.110998
Roscovitine	3.244	3.81099	0.0707973	1.17478	0.232392
QL.XII.47	-0.806898	0.284228	0.0707973	-0.352248	NA
ZG.10	1.97422	0.426252	0.0707973	0.215908	-2.21151
IOX2	-0.383877	-0.272424	0.0707973	0.709665	-0.49479
S.Trityl.L.cysteine	0.257388	0.391225	0.0824655	1.51998	0.604055
GSK429286A	2.91567	3.81776	0.0824655	1.30939	0.3889
PHA.793887	-1.4355	-0.414539	0.0824655	0.288776	-1.79198
T0901317	2.83725	3.28093	0.0824655	1.15638	0.209611
SL.0101.1	4.17997	4.03442	0.0824655	0.965177	-0.0511339
MK.2206	2.04962	0.662675	0.0824655	0.323317	-1.62898
PFI.1	1.41211	1.88478	0.0824655	1.33473	0.416547
Dabrafenib	3.62724	2.95662	0.0824655	0.815114	-0.294926
CMK	1.36805	1.55706	0.0955571	1.13816	0.186701
KIN001.135	3.53786	3.67868	0.0955571	1.0398	0.0563093
NG.25	2.04677	0.40416	0.0955571	0.197462	-2.34035
BIX02189	3.26651	2.6809	0.0955571	0.820721	-0.285037
Bosutinib	2.39305	1.17264	0.0955571	0.490021	-1.02908
CCT007093	3.38087	3.70307	0.0955571	1.0953	0.131326
Paclitaxel	-3.8382	-3.75453	0.110181	0.978203	-0.0317943
Salubrinal	2.69728	2.98897	0.110181	1.10814	0.148145
PF.562271	1.33552	1.74373	0.110181	1.30565	0.384774
MPS.1.IN.1	1.616	2.58867	0.110181	1.6019	0.679784
CX.5461	2.09551	0.441646	0.110181	0.210758	-2.24634
THZ.2.49	1.39186	-0.153947	0.110181	-0.110605	NA
AZD8055	-0.100149	-1.02437	0.110181	10.2284	3.35451
A.443654	-1.19633	-0.961226	0.126416	0.803478	-0.31567
IPA.3	2.91408	2.50365	0.126416	0.859156	-0.219007
GSK1070916	-3.11442	-1.51289	0.126416	0.485769	-1.04166
NPK76.II.72.1	0.694036	0.0875289	0.126416	0.126116	-2.98718
PD.0332991	1.91998	0.81407	0.126416	0.423999	-1.23787
NSC.87877	4.24667	4.73993	0.144381	1.11615	0.158534
Shikonin	0.103948	-0.780914	0.144381	-7.51255	NA
rTRAIL	-1.12764	-0.802188	0.144381	0.71139	-0.491288
Dasatinib	1.20832	0.204226	0.164127	0.169017	-2.56476
AKT.inhibitor.VIII	2.0405	2.30021	0.164127	1.12728	0.172844
EX.527	4.75846	4.88655	0.164127	1.02692	0.0383229
X681640	1.87751	1.24837	0.164127	0.664908	-0.588773
CCT018159	2.6514	2.40755	0.164127	0.90803	-0.139188
FK866	-5.49157	-6.07459	0.164127	1.10617	0.145569
CGP.60474	-2.72581	-2.27517	0.18575	0.834678	-0.260708
Bortezomib	-6.18364	-5.99398	0.18575	0.969329	-0.0449421
Zibotentan	4.6561	4.84545	0.18575	1.04067	0.0575093
PI.103	-1.54044	-0.859099	0.18575	0.557698	-0.842445
Temsirolimus	-2.40031	-3.37981	0.18575	1.40807	0.493721
Elesclomol	-2.19004	-2.70513	0.18575	1.2352	0.304741
MG.132	-0.784677	-0.529288	0.209304	0.67453	-0.568046
Z.LLNle.CHO	-0.0873041	0.0487247	0.209304	-0.558103	NA
VNLG.124	3.07161	3.56555	0.209304	1.16081	0.215128
CH5424802	2.39984	2.91098	0.209304	1.21299	0.278569
Vorinostat	0.378064	-0.0281218	0.209304	-0.0743836	NA
X17.AAG	0.920404	0.439535	0.209304	0.477545	-1.06629
HG.5.88.01	3.73525	4.16119	0.209304	1.11403	0.155789
JW.7.52.1	-2.38612	-2.25136	0.234852	0.943522	-0.0838723
HG.6.64.1	2.07495	0.971018	0.234852	0.467972	-1.09551
NSC.207895	2.74536	3.057	0.234852	1.11352	0.155122
OSI.930	2.4159	2.9961	0.234852	1.24016	0.310525
SNX.2112	-2.11931	-3.05132	0.234852	1.43977	0.525841
Navitoclax	1.97989	0.503357	0.234852	0.254234	-1.97577
AZD7762	-0.55156	-1.04704	0.234852	1.89833	0.924728
Erlotinib	2.54067	2.6099	0.262418	1.02725	0.0387883
VX.680	0.597293	1.32378	0.262418	2.21629	1.14815
BI.2536	-2.76809	-2.42542	0.262418	0.876206	-0.190659
Epothilone.B	-4.75562	-4.97965	0.262418	1.04711	0.0664109
BX.795	1.92282	1.28137	0.262418	0.666402	-0.585535
BIRB.0796	4.15952	4.15716	0.262418	0.999433	-0.000818899
JNK.Inhibitor.VIII	4.04689	4.15736	0.262418	1.0273	0.0388519
Tamoxifen	2.63783	2.93978	0.262418	1.11447	0.156358
YK.4.279	1.64774	1.10248	0.262418	0.669089	-0.57973
X.5Z..7.Oxozeaenol	1.26116	0.75322	0.262418	0.597245	-0.743605
Temozolomide	4.6666	4.96876	0.262418	1.06475	0.0905112
ZSTK474	-0.831196	-0.583922	0.292051	0.702508	-0.509413
TPCA.1	2.51467	1.21098	0.292051	0.481567	-1.05419
XMD15.27	3.46852	3.59562	0.292051	1.03664	0.0519197
AICAR	7.50913	6.82141	0.292051	0.908416	-0.138574
ATRA	3.91891	3.55772	0.292051	0.907834	-0.1395
VX.702	2.24031	2.15892	0.292051	0.963672	-0.0533859
PD.173074	2.10519	1.78339	0.292051	0.84714	-0.239328
AG.014699	3.22082	3.09808	0.292051	0.961892	-0.0560536
WH.4.023	2.79224	2.18669	0.323734	0.78313	-0.352676
AUY922	-3.21764	-3.42899	0.323734	1.06568	0.0917795
AS605240	1.87848	2.63215	0.323734	1.40121	0.486675
CAY10603	-0.167857	-0.772824	0.323734	4.60406	2.20291
QL.VIII.58	-1.02394	-1.59239	0.323734	1.55516	0.637065
PHA.665752	2.8966	2.76728	0.357485	0.955355	-0.0658909
Cyclopamine	3.69522	3.9432	0.357485	1.06711	0.0937056
Sorafenib	1.7176	2.11438	0.357485	1.23101	0.299841
GW843682X	-3.47224	-3.12714	0.357485	0.900612	-0.151023
Midostaurin	-0.718676	-0.0605256	0.357485	0.0842182	-3.56972
BMS345541	1.64598	1.91284	0.357485	1.16213	0.216769
Tipifarnib	1.07952	1.28496	0.357485	1.19031	0.251337
BEZ235	-2.83198	-3.17996	0.357485	1.12287	0.167195
PD.0325901	0.302439	-0.118003	0.357485	-0.390172	NA
XMD11.85h	4.42748	3.73975	0.357485	0.844668	-0.243544
UNC1215	1.78811	1.89362	0.357485	1.05901	0.0827098
Doxorubicin	-1.65241	-2.25453	0.393265	1.36439	0.448253
X5.Fluorouracil	3.39113	2.56016	0.393265	0.754956	-0.405535
Ispinesib.Mesylate	-4.30046	-3.82122	0.393265	0.888561	-0.170457
XMD13.2	1.63858	1.94973	0.393265	1.18989	0.250826
THZ.2.102.1	-4.17457	-4.27945	0.393265	1.02512	0.0357986
Vinblastine	-4.94128	-5.01602	0.393265	1.01513	0.0216605
Docetaxel	-3.47582	-4.09173	0.393265	1.1772	0.235359
RO.3306	3.43837	3.31581	0.393265	0.964356	-0.052363
HG.5.113.01	1.43626	0.934503	0.393265	0.65065	-0.620047
XAV939	3.20102	3.42989	0.393265	1.0715	0.0996307
Lapatinib	2.4819	2.51305	0.431036	1.01255	0.0179944
CP466722	1.75319	1.37882	0.431036	0.786466	-0.346544
OSU.03012	0.995089	1.21963	0.431036	1.22565	0.293544
PAC.1	1.26955	0.958028	0.431036	0.75462	-0.406178
JW.7.24.1	-0.645791	-0.352524	0.431036	0.54588	-0.873344
AR.42	-1.45586	-1.78086	0.431036	1.22323	0.290701
KIN001.236	2.87355	2.47469	0.431036	0.861198	-0.215584
KIN001.260	3.18274	2.92193	0.431036	0.918054	-0.123349
CEP.701	-1.05669	-1.32685	0.431036	1.25566	0.328442
KU.55933	3.01458	2.9481	0.431036	0.977947	-0.0321724
NU.7441	2.127	1.78153	0.431036	0.837581	-0.255699
Nutlin.3a....	3.77218	3.08274	0.431036	0.81723	-0.291186
SN.38	-4.60136	-4.05953	0.431036	0.882246	-0.180747
Gemcitabine	-2.5684	-3.18138	0.470729	1.23866	0.308783
Vinorelbine	-4.73505	-4.63161	0.470729	0.978156	-0.0318637
AP.24534	0.0903937	-0.143709	0.470729	-1.58982	NA
Bexarotene	3.31991	3.84876	0.470729	1.1593	0.213251
CUDC.101	-1.97352	-1.99902	0.470729	1.01292	0.0185253
I.BET.762	0.729562	1.17423	0.470729	1.6095	0.686612
KIN001.244	1.84332	1.70023	0.470729	0.922375	-0.116575
Foretinib	-0.0821849	-0.513665	0.470729	6.25011	2.64388
Camptothecin	-3.0894	-3.90385	0.470729	1.26363	0.33757
Gefitinib	0.917212	0.864545	0.470729	0.94258	-0.0853129
SB.505124	3.4414	3.56513	0.470729	1.03595	0.0509588
Mitomycin.C	0.0212879	-0.691933	0.512287	-32.5036	NA
Obatoclax.Mesylate	-2.21287	-1.71198	0.512287	0.773646	-0.370254
Bleomycin	1.55943	1.49234	0.512287	0.956976	-0.0634449
AS601245	1.84814	1.77573	0.512287	0.960822	-0.0576596
TL.2.105	1.76453	2.04059	0.512287	1.15645	0.209702
OSI.027	-1.42253	-1.37466	0.512287	0.966346	-0.0493878
KIN001.270	3.95678	3.80044	0.512287	0.960489	-0.0581587
Lenalidomide	3.06209	3.16167	0.512287	1.03252	0.0461669
SB.216763	3.84577	4.12469	0.512287	1.07253	0.101014
piperlongumine	1.5163	1.39128	0.512287	0.917548	-0.124144
Talazoparib	1.99742	2.34072	0.512287	1.17187	0.228815
TAE684	1.05806	1.32248	0.555587	1.24991	0.321826
WZ.1.84	3.70425	3.83338	0.555587	1.03486	0.0494339
FR.180204	4.61488	4.33044	0.555587	0.938364	-0.0917799
Y.39983	2.99883	2.67027	0.555587	0.890437	-0.167414
QL.XI.92	1.94337	2.38492	0.555587	1.22721	0.295381
CI.1040	3.0907	2.90811	0.555587	0.940922	-0.0878528
Veliparib	3.45986	3.45541	0.555587	0.998714	-0.00185664
Axitinib	1.95916	1.79483	0.555587	0.916126	-0.126383
SB590885	3.32726	3.28691	0.555587	0.987873	-0.0176025
Pyrimethamine	3.41947	3.30536	0.600527	0.966629	-0.0489658
TGX221	4.17141	4.11587	0.600527	0.986687	-0.0193361
GW.2580	4.88026	4.95112	0.600527	1.01452	0.0207986
BX.912	-0.0768646	0.478708	0.600527	-6.22793	NA
WZ3105	-2.47728	-2.1725	0.600527	0.876971	-0.189398
Linifanib.	1.76151	1.66789	0.600527	0.946854	-0.0787858
GSK2126458	-4.48163	-4.30516	0.600527	0.960622	-0.0579587
TW.37	-0.561507	-0.656864	0.600527	1.16982	0.226289
XMD8.92	2.23706	2.17031	0.600527	0.97016	-0.0437051
Trametinib	0.834662	0.620696	0.600527	0.743649	-0.427305
AZ628	2.25404	1.96543	0.64697	0.871958	-0.19767
Etoposide	0.988519	1.10016	0.64697	1.11294	0.154377
JNK.9L	-0.729808	-0.692727	0.64697	0.949191	-0.0752289
BAY.61.3606	1.06202	1.11768	0.64697	1.05241	0.0736929
YM155	-5.06858	-5.07151	0.64697	1.00058	0.000833386
TG101348	0.545354	0.688692	0.64697	1.26283	0.336665
Saracatinib	2.13015	2.11411	0.694769	0.992468	-0.0109069
CGP.082996	2.31897	2.46622	0.694769	1.0635	0.0888144
Genentech.Cpd.10	0.558178	0.352523	0.694769	0.63156	-0.663008
XMD14.99	2.49571	2.55462	0.694769	1.02361	0.0336621
QL.XII.61	2.41625	2.41197	0.694769	0.998231	-0.00255395
Crizotinib	1.87482	2.03712	0.743754	1.08657	0.119781
XMD8.85	2.6075	2.73128	0.743754	1.04747	0.0669111
DMOG	5.42685	5.18298	0.743754	0.955064	-0.0663314
FTI.277	2.00718	2.06362	0.743754	1.02812	0.0400124
LAQ824	-3.63398	-3.69113	0.743754	1.01573	0.0225118
AT.7519	-2.2347	-1.71701	0.743754	0.768338	-0.380188
XL.184	1.7396	1.84033	0.743754	1.0579	0.0812084
AC220	1.31002	1.1536	0.743754	0.880598	-0.183445
VX.11e	2.08077	2.47917	0.743754	1.19147	0.252743
KIN001.055	3.34213	3.27145	0.743754	0.978853	-0.0308364
PIK.93	0.514218	-0.0695155	0.743754	-0.135187	NA
Tivozanib	-0.567212	-0.335224	0.743754	0.591002	-0.758764
ZM.447439	1.44072	1.70371	0.743754	1.18254	0.241893
MLN4924	0.575016	0.800723	0.743754	1.39252	0.477701
MS.275	0.116741	0.109562	0.79376	0.938498	-0.0915738
LY317615	2.01608	1.98335	0.79376	0.983762	-0.0236181
Belinostat	-1.15292	-1.27088	0.79376	1.10231	0.140533
Masitinib	1.98064	2.19891	0.79376	1.1102	0.150818
GSK690693	1.59251	1.9063	0.79376	1.19704	0.259476
GDC0449	3.83582	3.88081	0.79376	1.01173	0.0168222
Ruxolitinib	2.9105	2.53998	0.844582	0.872694	-0.196453
BHG712	0.876054	0.83549	0.844582	0.953696	-0.0683986
Cisplatin	3.17255	3.02213	0.844582	0.952587	-0.0700769
Methotrexate	-2.56498	-2.82935	0.844582	1.10307	0.141523
EHT.1864	3.02485	3.0157	0.844582	0.996976	-0.00436953
Sunitinib	2.14604	2.04278	0.896036	0.951885	-0.0711414
GSK.650394	2.79831	2.65764	0.896036	0.949732	-0.0744069
Pazopanib	3.33846	3.34432	0.896036	1.00175	0.00252964
KIN001.102	0.4349	0.680647	0.896036	1.56507	0.646224
FMK	4.2192	4.24793	0.896036	1.00681	0.00979232
YM201636	0.861029	0.682938	0.896036	0.793165	-0.334306
Cytarabine	0.093142	0.430217	0.896036	4.61893	2.20756
AMG.706	2.65378	2.63604	0.896036	0.993317	-0.00967457
A.770041	2.00724	2.00388	0.947915	0.998325	-0.00241813
FH535	2.06526	2.10695	0.947915	1.02019	0.028833
Phenformin	5.9664	5.97947	0.947915	1.00219	0.00315539
CAL.101	3.22086	3.2835	0.947915	1.01945	0.027788
Tubastatin.A	2.34582	2.44531	0.947915	1.04241	0.0599285
GW.441756	2.60116	2.52443	0.947915	0.970503	-0.0431961
PF.4708671	3.27035	3.27298	0.947915	1.00081	0.00116104
Embelin	2.69134	2.6465	1	0.983341	-0.0242356
SB52334	4.12698	3.9512	1	0.957408	-0.0627946
Bleomycin..50.uM.	2.5879	2.69964	1	1.04318	0.060984
Imatinib	2.38667	2.58381	1	1.0826	0.114497
JQ12	1.26884	1.30838	1	1.03116	0.0442731
EKB.569	0.417799	0.465411	1	1.11396	0.155696
