# Supplementary material for: Integrated machine learning survival framework develops a prognostic model based on inter-crosstalk definition of mitochondrial function and cell death patterns in a large multicenter cohort for lower-grade glioma
Source: J Transl Med. 2023 Sep 2;21:588. doi: 10.1186/s12967-023-04468-x (PMC10474752; doi:10.1186/s12967-023-04468-x)
Supplement: Supplementary file 17 — Additional file 17: Shown for chemotherapeutic agents with low and high mtPCDI groups using the “pRRophetic”. [file 12967_2023_4468_MOESM17_ESM.xlsx]

## Sheet: Sheet1
	TCGA-CS-4941	TCGA-CS-4942	TCGA-CS-4943	TCGA-CS-5394	TCGA-CS-5395	TCGA-CS-5396	TCGA-CS-5397	TCGA-CS-6186	TCGA-CS-6188	TCGA-CS-6290	TCGA-DB-5277	TCGA-DB-A4XB	TCGA-DB-A4XC	TCGA-DB-A64O	TCGA-DB-A64W	TCGA-DB-A75K	TCGA-DB-A75P	TCGA-DH-5142	TCGA-DH-A669	TCGA-DH-A66B	TCGA-DH-A66G	TCGA-DH-A7UR	TCGA-DH-A7UT	TCGA-DH-A7UU	TCGA-DH-A7UV	TCGA-DU-5847	TCGA-DU-5852	TCGA-DU-5854	TCGA-DU-6392	TCGA-DU-6393	TCGA-DU-6394	TCGA-DU-6395	TCGA-DU-6396	TCGA-DU-6397	TCGA-DU-6399	TCGA-DU-6400	TCGA-DU-6402	TCGA-DU-6403	TCGA-DU-6404	TCGA-DU-6405	TCGA-DU-6406	TCGA-DU-6410	TCGA-DU-6542	TCGA-DU-7006	TCGA-DU-7007	TCGA-DU-7010	TCGA-DU-7012	TCGA-DU-7013	TCGA-DU-7018
Crizotinib	3.83157	1.73686	3.31706	2.53902	0.771927	3.36864	-1.06675	4.3065	4.00319	0.0287632	4.16283	-1.7303	0.388598	-0.209107	0.834344	2.49128	3.1899	3.79854	0.740061	-2.17488	3.09542	-1.69701	0.551995	3.29776	2.46003	1.16808	2.10038	-1.29397	1.63019	3.29212	0.928362	1.9596	2.45851	4.17006	1.55359	1.0291	3.09457	4.09074	2.47554	-1.33509	0.285003	0.967894	4.47488	-0.839286	1.67513	-0.943586	1.98978	3.32436	3.25581
Sorafenib	2.86175	3.16804	1.35008	4.62285	0.0927715	4.55278	0.922222	5.38486	3.54255	-3.84635	3.2356	-1.24036	-1.72361	-3.81416	-1.54685	1.95737	2.4137	4.22058	1.02478	-0.9029	2.0658	0.370594	-0.707394	2.40582	1.71271	0.128266	1.73933	1.30541	-2.15844	4.81882	-0.0478234	2.00596	2.80922	2.71869	3.15332	1.89263	4.54114	3.31809	2.56558	-2.90811	-0.667494	1.1784	2.22812	-1.2476	0.637765	-1.32797	3.27181	3.69903	3.32995
GNF-2	2.96565	3.15396	2.07244	3.63699	-0.739347	3.15493	1.35595	4.62198	3.48336	0.524088	3.66648	0.389768	-1.00802	0.935902	1.85122	2.12971	2.75407	3.23117	1.41054	-0.739347	2.82693	2.61103	-0.042285	3.16331	2.78867	-0.0781977	2.50183	1.95311	1.01448	3.19686	-0.537614	2.45421	3.23991	3.67785	3.96731	2.33398	3.48745	3.18002	2.9804	1.64933	-0.0671031	2.30021	0.957527	2.01874	2.27177	0.516772	3.06409	3.81951	3.13378
BI-2536	-0.645105	-1.31014	-3.84157	-1.00471	-4.44099	-3.32641	-4.57131	-3.40506	0.478168	-4.66849	1.28124	-3.45101	-3.22761	-3.26751	-1.22391	-3.92084	-2.65679	-0.0412544	3.45802	-4.57595	-0.627153	-2.89854	-2.45586	-2.49436	3.83673	-2.99072	-2.92074	-3.39271	-2.60597	-1.80025	-5.07337	-3.47363	-2.26741	0.0574555	-4.46559	-2.55504	1.16117	0.0658447	-2.45571	-4.10748	-3.90941	-2.94455	-0.351688	-2.91164	-3.00812	-4.00026	-2.0463	-1.67118	-1.11238
Saracatinib	4.36711	1.01421	3.81712	3.14664	-0.124007	1.41341	2.56427	4.45945	3.84485	-0.440913	3.99394	1.55006	0.45361	-1.33753	1.27728	3.20369	3.05944	1.41861	3.73306	1.02238	3.45934	-0.373308	0.337652	2.67698	3.81995	1.33912	2.49005	1.51986	3.51342	2.35115	2.17455	1.21088	2.50153	4.34833	3.6198	-0.340351	-0.259692	2.99698	0.893341	-0.519011	3.03483	1.18525	4.81632	-0.169732	-0.454689	0.511368	2.3021	2.10933	2.7693
EX-527	4.86854	5.46095	4.59813	5.516	2.40191	5.475	4.38978	6.11169	5.32215	3.71552	5.36079	3.08843	4.40327	4.79432	4.91382	3.99631	4.66207	5.6195	3.74616	1.45109	4.85136	5.42925	4.44688	5.37878	5.56173	4.38058	4.77573	4.34939	2.80527	5.80816	2.52839	4.99174	5.32507	4.95081	5.66961	5.59116	6.07399	5.46387	5.45076	4.01628	2.56589	4.91198	4.05919	5.11869	4.72766	3.53945	5.38874	5.6645	5.34454
VX-680	7.36589	0.950648	2.15878	4.28057	-3.23381	2.55013	0.0655904	5.05903	5.33747	-4.06034	7.39953	-2.57051	-4.78516	-2.67354	-0.749438	1.74134	3.71388	0.810817	-1.97965	-1.01118	3.0735	-1.98848	-2.6057	3.13273	1.50815	-0.318999	1.98992	-2.81881	0.756064	3.43139	-0.749547	1.45856	3.17904	7.31118	3.15511	-2.12141	1.22177	1.78788	0.369906	-2.69466	-0.628236	-0.146652	4.20638	-4.86717	-3.36081	-4.30347	2.35423	3.46514	3.25373
Tivozanib	1.00885	0.281606	-0.299563	1.42907	-3.75547	0.475585	-1.84771	2.1535	1.12209	-3.7526	1.24003	-4.83095	-2.36714	-1.90599	-0.474925	-0.621069	-0.290906	1.05676	-3.01779	-3.2166	0.257308	-0.584062	-2.06005	0.699594	1.00372	-2.12555	-0.329731	-1.41011	-2.40229	0.955471	-2.27701	-0.514883	0.3729	1.05756	1.3705	-0.34411	0.709254	0.998868	0.368104	-3.77985	-2.66787	-0.587486	-0.225309	-1.86963	-0.434102	-2.91686	0.549181	0.777346	0.582038
HG-5-113-01	6.52894	1.6493	3.41669	0.356169	0.187478	0.0896098	1.05661	5.64025	3.21018	-2.58137	3.16144	1.10025	-0.767466	0.990302	0.810738	0.74322	3.18401	3.23139	3.83071	1.13108	1.48448	1.6797	0.198724	2.73076	4.22365	0.827332	0.229981	0.929	3.06573	0.947817	1.1577	1.21007	-0.212153	3.87359	2.47853	0.826818	0.951639	1.87702	0.78714	-0.894037	2.74727	-0.93594	5.32436	1.47748	4.7123	2.88893	0.769032	3.68412	1.95537
Midostaurin	1.897	2.96776	0.29772	5.46252	-3.77868	1.86795	-1.2632	5.02933	3.19095	-4.64879	2.30231	-2.89296	-2.32557	-2.31697	-3.07096	-1.18692	0.166837	3.19781	-3.95635	-3.93905	0.948694	0.382409	-3.6147	1.24442	3.19082	-2.54474	-1.14448	-1.20741	0.115066	2.85307	-2.40995	-0.0997353	0.689992	1.6286	2.7903	1.03075	4.41147	2.02706	0.908984	-3.62953	-3.18316	-1.33593	-0.864768	-2.61185	1.46505	-4.45761	1.36451	3.00843	1.84282
GW-2580	5.00779	4.79084	5.02099	5.76573	4.82293	5.22758	4.26959	5.80802	5.2546	4.36647	5.47936	3.54104	4.03663	4.21022	4.43582	4.82108	5.049	5.15927	4.50328	4.1934	5.25878	4.43265	3.68093	4.99582	4.90646	5.05729	4.61976	4.07444	3.68983	5.78015	2.68683	4.69202	5.0316	5.22802	5.38208	5.04135	4.8744	4.87031	4.8576	3.63046	4.62747	4.55924	5.15913	4.60674	4.79557	4.11838	5.05096	5.24409	4.84388
XAV939	4.04568	3.87191	2.99481	4.39061	0.365647	3.17712	2.0633	3.76584	4.3373	2.1672	4.79952	2.39529	1.7702	2.53234	3.55344	2.51934	3.77296	3.84818	3.73019	1.08181	4.07176	2.91255	2.9705	3.80583	4.51556	2.8709	3.46428	3.55903	2.80527	3.43568	0.783749	2.90576	4.10606	4.55675	3.31049	3.26825	3.41182	3.97941	3.37275	2.83137	2.34419	3.32766	3.29167	3.64803	2.87905	2.02382	3.47709	3.77229	3.85272
Paclitaxel	-3.61941	-3.45609	-3.87278	-3.66723	-4.14162	-3.75787	-4.012	-3.61353	-3.44757	-4.48457	-3.47087	-4.02156	-4.21761	-3.97353	-3.93344	-3.9866	-3.76477	-3.629	-3.8765	-4.30558	-3.75794	-3.87082	-3.9921	-3.71675	-3.30775	-3.91423	-3.83993	-4.00077	-3.73358	-3.61511	-4.50807	-3.87428	-3.71484	-3.47681	-3.96264	-3.78015	-3.43209	-3.63652	-3.66071	-4.11282	-4.18375	-3.93728	-3.6982	-4.05934	-3.81671	-4.13014	-3.63361	-3.57084	-3.62125
Salubrinal	4.14787	4.34277	2.80044	5.13699	1.21448	3.14031	2.42904	5.36528	4.55431	1.77532	4.28637	2.0527	1.43356	2.24893	2.4876	2.21065	3.09597	3.60722	3.10185	0.833201	3.26624	2.5178	2.52142	3.36514	5.37097	2.20795	2.66939	2.33247	4.93632	3.60099	1.40446	2.49644	3.27833	4.18201	4.10111	2.64359	3.61355	3.35303	3.29698	2.29069	1.97331	2.51571	3.0461	2.64452	3.92788	1.83179	3.43283	4.3061	3.55098
AKT inhibitor VIII	3.11434	3.3195	1.69495	4.69507	0.257948	2.75061	1.11372	3.74354	3.44723	0.456932	3.63624	0.905353	1.04543	1.96743	1.80967	0.846269	2.25459	3.67256	0.416889	0.214493	2.58493	2.86255	2.11294	2.28762	3.51078	1.37912	2.00049	1.45491	2.30388	3.51537	0.720946	2.20661	2.84464	2.93231	3.42795	2.65365	4.12769	3.04472	2.84525	1.23551	0.244106	2.34825	1.03017	1.95142	3.21053	0.91517	2.8796	3.30475	2.78146
T0901317	4.45485	4.52038	1.79359	5.32705	-0.513824	3.88589	1.24097	5.27633	4.49666	0.806212	4.92295	1.8005	1.54222	2.99784	2.93825	1.27002	3.41816	4.03015	1.08124	3.37596	3.5316	3.08337	3.25381	3.95692	4.63368	2.24618	3.0723	2.60607	2.83551	4.40111	-0.251447	2.98617	4.12318	4.41651	4.46783	3.30792	4.41699	3.70241	4.02667	1.87019	-2.48951	3.33012	1.65642	2.97982	4.12361	-1.09022	3.88201	4.48696	3.93532
[truncated: 437 more columns]
